# Supplementary material
Source: PubMed Central journal article supplement (PMC3811389)
Supplement: AEM.01150-13_zam999104663so1.pdf [file AEM.01150-13_zam999104663so1.pdf]

## 1 **Supplementary Data**

2

### 3 **Phenotypic characteristics of strain QM49**

4 Cells are Gram-negative, aerobic, non-spore-forming, non-motile, and rod shaped, 0.3-0.5  $\mu\text{m}$  in  
5 diameter and 1.5-2.4  $\mu\text{m}$  in length after culture on R2A agar for 3 days. Colonies grown on R2A agar  
6 for 3 days are smooth, circular, translucent, creamy-white and convex. Grows at 4-37°C and in pH  
7 6.0-8.5, but not at 42°C. Optimum growth occurs at 25-30°C and pH 7.0. Growth occurs in the  
8 absence of NaCl and in the presence of 1.0% (w/v) NaCl, but not 2.0% (w/v) NaCl. Growth occurs  
9 on nutrient agar but not on MacConkey agar. Catalase-positive and oxidase-positive. Nitrate is  
10 reduced to nitrite in aerobic conditions. Urease, arginine dihydrolase,  $\beta$ -Galactosidase and  $\beta$ -  
11 glucosidase are positive. Protease activity and indole production are negative. Does not produce any  
12 acid or gas from glucose. The following compounds are utilized as sole carbon sources: D-glucose,  
13 D-mannose, D-maltose, salicin, D-melibiose, L-fucose, L-arabinose, L-rhamnose, *N*-acetyl-D-  
14 glucosamine, D-sucrose, D-maltose, and glycogen. The following compounds are not utilized as sole  
15 carbon sources: D-mannitol, gluconate, caprate, adipate, malate, citrate, phenyl-acetate, D-sorbitol  
16 propionate, caprate, valerate, L-histidine, 2-ketogluconate, 3-hydroxy-butyrate, 4-hydroxy-benzoate,  
17 L-proline, D-ribose, itaconate, suberate, malonate, acetate, lactate, L-alanine, 5-ketogluconate 3-  
18 hydroxy-benzoate, and L-serine.

19

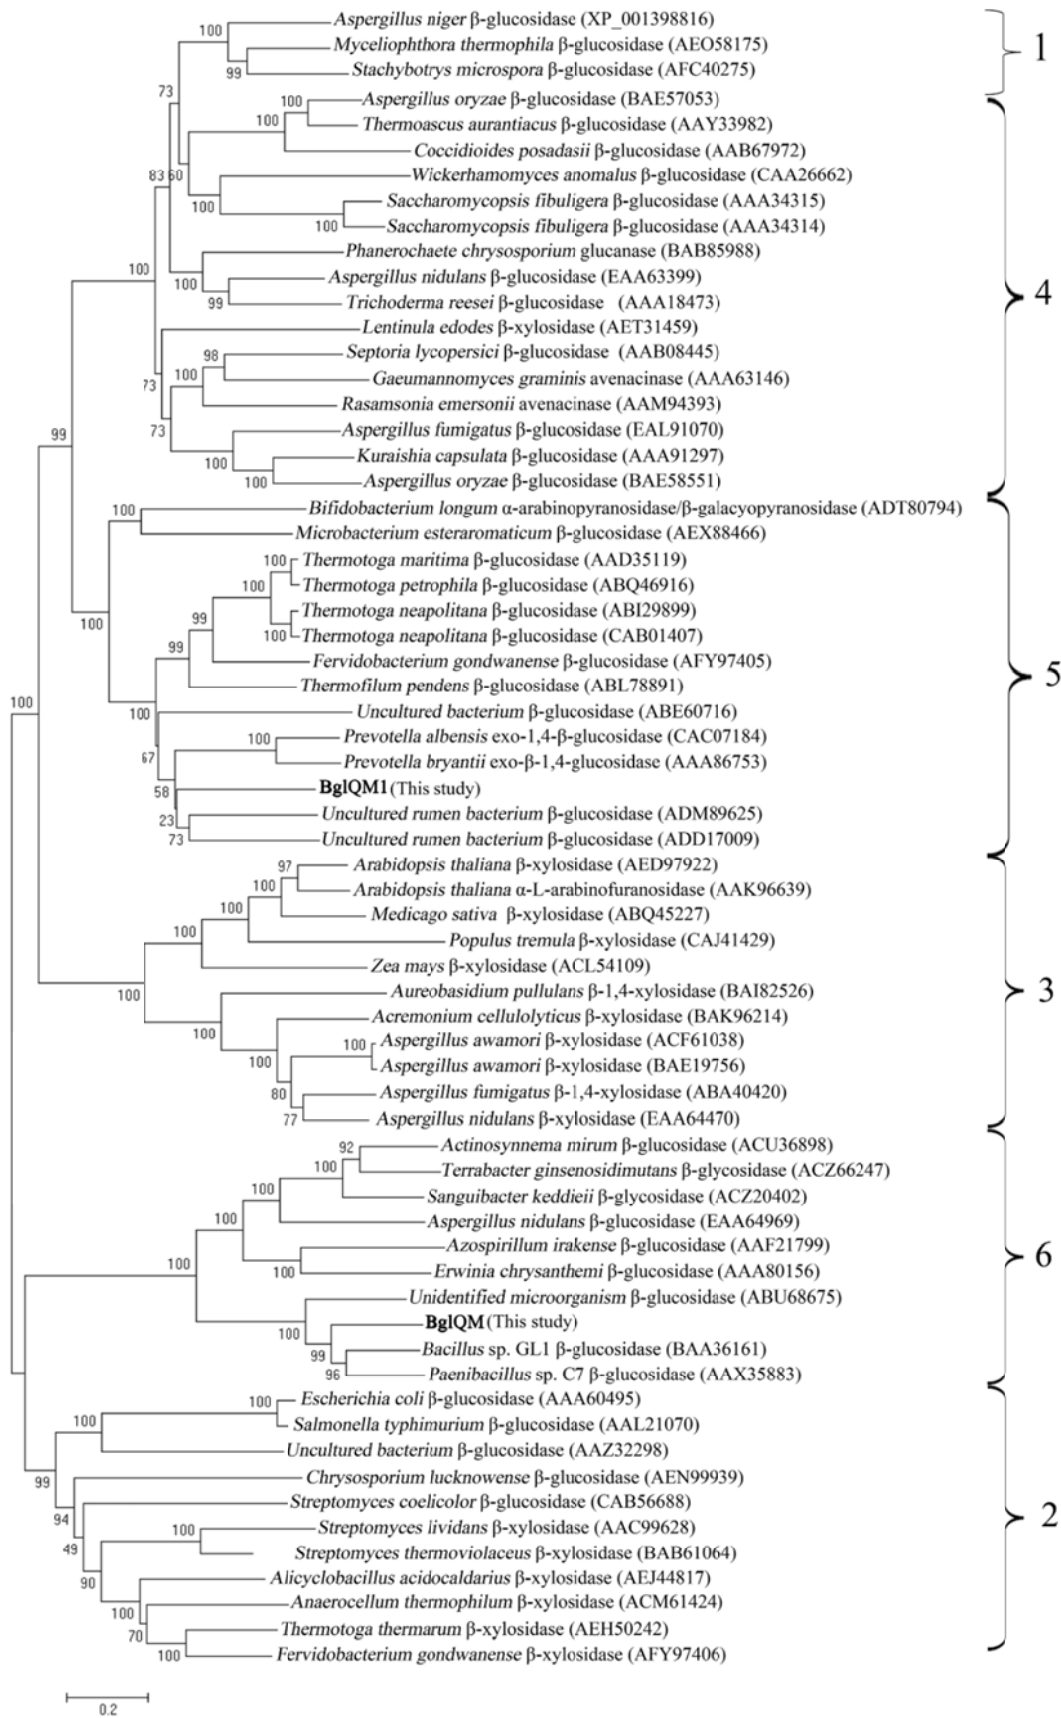

20

21 Supplementary Fig. S1.

22 **Supplementary Fig. S1.** Phylogenetic analysis of characterized glycoside hydrolases family 3.  
23 Amino acid sequences were obtained from the NCBI/EMBL database and CAZy database (accession  
24 numbers are indicated on the tree). This tree was made using the neighbor-joining method (4) with a  
25 Kimura two-parameter distance matrix (2) and pairwise deletion. Bootstrap values expressed as  
26 percentages of 1000 replications greater than 50% are shown at the branch points. The bar represents  
27 20 amino acid residues substitutions per 1000 amino acid residues.

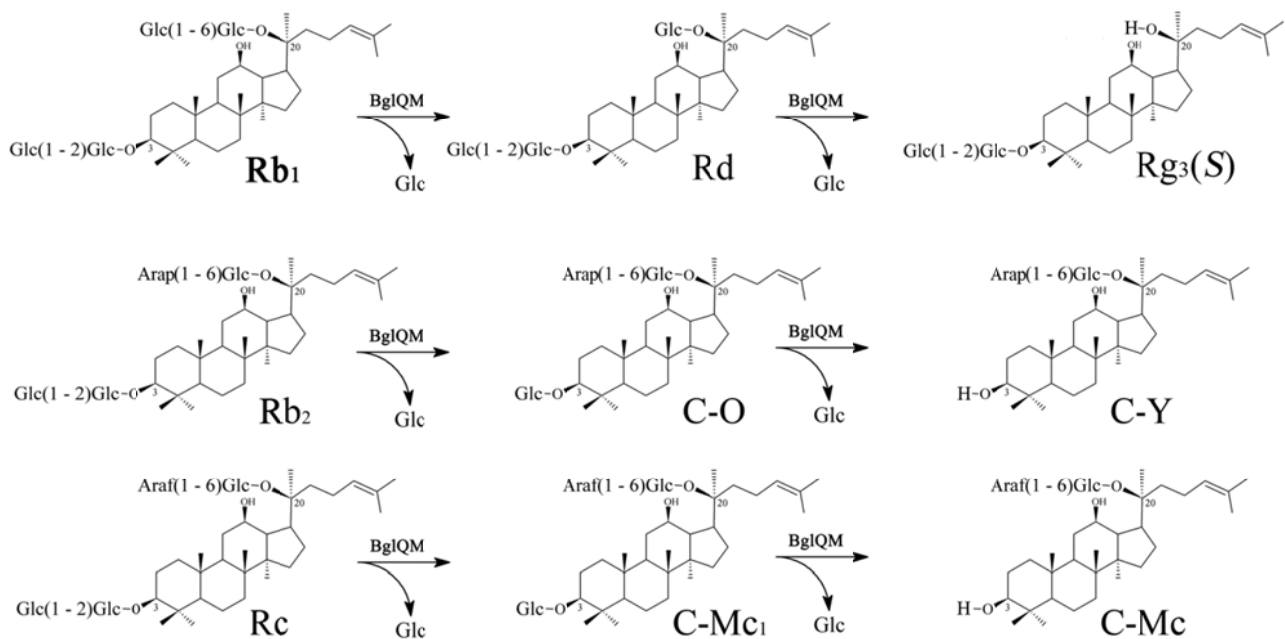

33  
34 **Supplementary Fig. S2.** Transformation pathways of ginsenosides Rb<sub>1</sub>, Rb<sub>2</sub>, Rc, and Rd by  
35 recombinant BglQM, respectively.

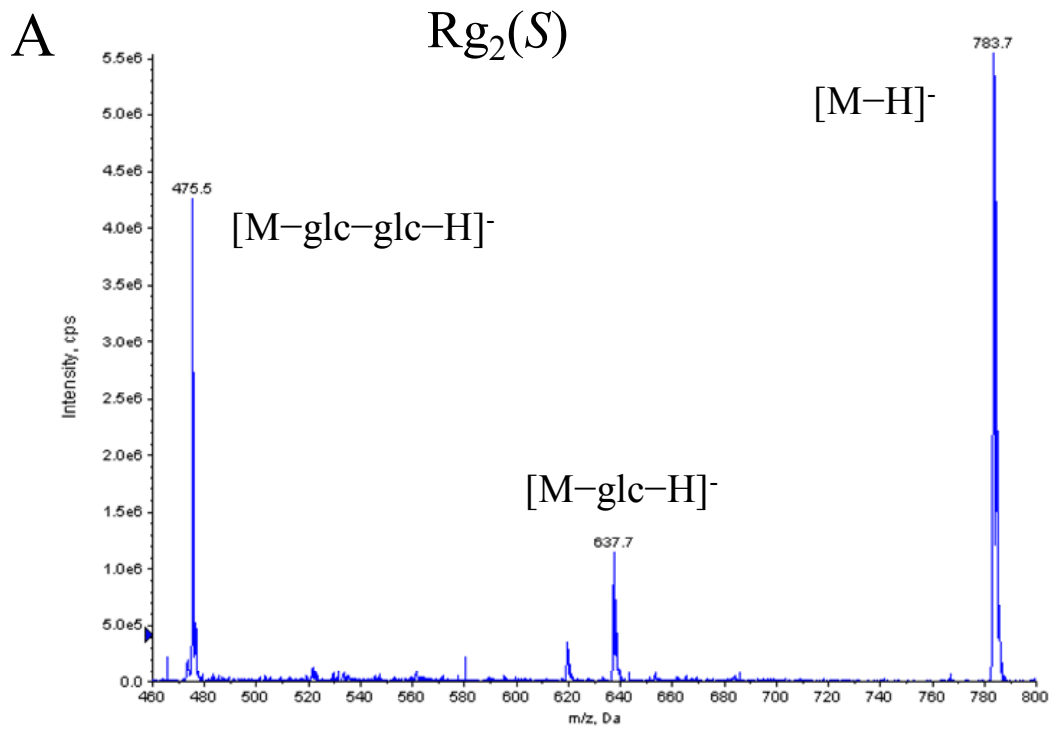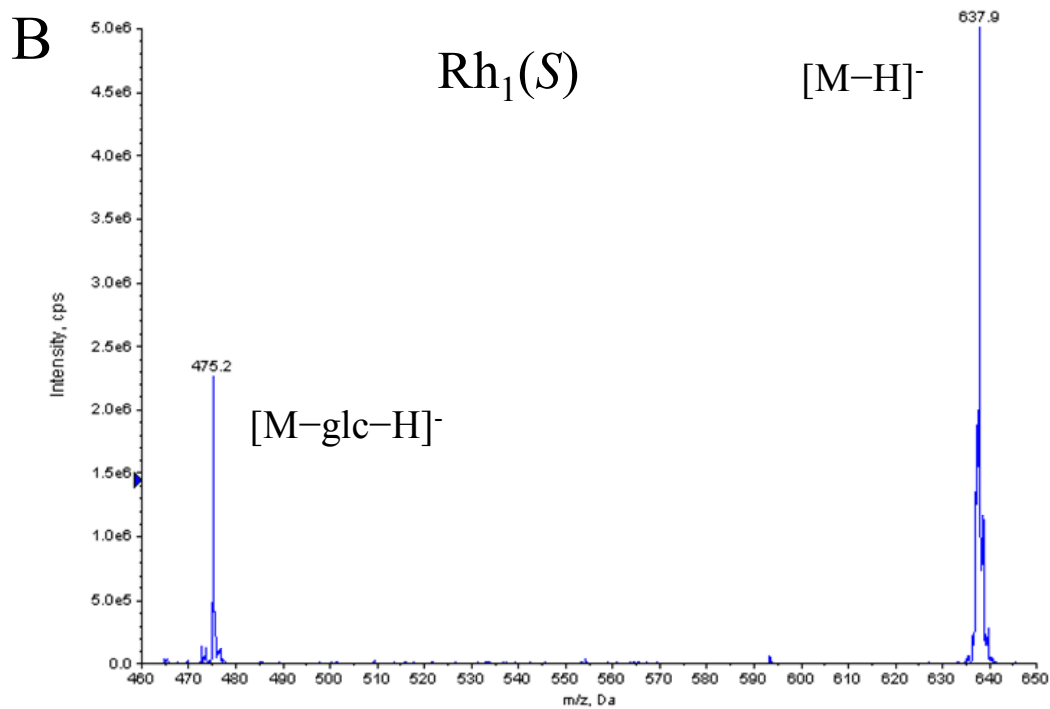

36

37 **Supplementary Fig. S3.** Negative ion ESI-MS-MS spectra of biotransformed ginsenosides by

38 BglQM: A, MS-MS spectrum of ginsenoside  $Rg_2(S)$ ; B, MS-MS spectrum of ginsenoside  $Rh_1(S)$ .

39

40 **Table S1.** Isolated strains with ginsenoside-converting abilities

| Strain name | Most closest type strain                                 | Similarity <sup>a</sup><br>(%) | b.p. <sup>b</sup> | Transformed ginsenosides |                     |                          |
|-------------|----------------------------------------------------------|--------------------------------|-------------------|--------------------------|---------------------|--------------------------|
|             |                                                          |                                |                   | Re                       | Rg <sub>1</sub>     | Rb <sub>1</sub>          |
| QM01        | <i>Paenibacillus glycanilyticus</i> DS-1 <sup>T</sup>    | 99.3                           | 728               | Rg <sub>2</sub> (S)      | Rh <sub>1</sub> (S) | Rd                       |
| QM04        | <i>Burkholderia soli</i> GP25-8 <sup>T</sup>             | 99.0                           | 728               | Rg <sub>2</sub> (S)      | Rh <sub>1</sub> (S) | Rd, F <sub>2</sub> , C-K |
| QM05        | <i>Dyella koreensis</i> BB4 <sup>T</sup>                 | 99.6                           | 734               | -                        | -                   | Rd, F <sub>2</sub>       |
| QM06        | <i>Dyella koreensis</i> BB4 <sup>T</sup>                 | 99.6                           | 734               | -                        | Rh <sub>1</sub> (S) | Rd, F <sub>2</sub>       |
| QM08        | <i>Dyella koreensis</i> BB4 <sup>T</sup>                 | 99.6                           | 734               | -                        | -                   | Rd, F <sub>2</sub>       |
| QM12        | <i>Dyella koreensis</i> BB4 <sup>T</sup>                 | 99.6                           | 734               | -                        | Rh <sub>1</sub> (S) | Rd, F <sub>2</sub>       |
| QM15        | <i>Bacillus acidiceler</i> CBD 119 <sup>T</sup>          | 99.7                           | 738               | PPT                      | PPT                 | Rd                       |
| QM18        | <i>Asticcacaulis biprosthecium</i> ACM 2498 <sup>T</sup> | 98.8                           | 673               | -                        | -                   | Rd, F <sub>2</sub> , C-K |
| QM20        | <i>Dyella koreensis</i> BB4 <sup>T</sup>                 | 99.6                           | 734               | -                        | -                   | Rd, F <sub>2</sub> , C-K |
| QM21        | <i>Dyella koreensis</i> BB4 <sup>T</sup>                 | 99.6                           | 734               | -                        | -                   | F <sub>2</sub>           |
| QM26        | <i>Dyella japonica</i> XD53 <sup>T</sup>                 | 98.5                           | 734               | -                        | -                   | Rd, F <sub>2</sub>       |
| QM28        | <i>Dyella japonica</i> XD53 <sup>T</sup>                 | 98.5                           | 734               | -                        | -                   | Rd, F <sub>2</sub>       |
| QM45        | <i>Dyella koreensis</i> BB4 <sup>T</sup>                 | 99.6                           | 734               | -                        | Rh <sub>1</sub> (S) | F <sub>2</sub>           |
| QM48        | <i>Dyella koreensis</i> BB4 <sup>T</sup>                 | 99.6                           | 734               | -                        | Rh <sub>1</sub> (S) | F <sub>2</sub>           |
| QM49        | <i>Mucilaginibacter gossypiicola</i> Gh-48 <sup>T</sup>  | 99.9                           | 1450              | Rg <sub>2</sub> (S)      | Rh <sub>1</sub> (S) | C-K                      |

41 <sup>a</sup>Similarity is based on 16S rRNA gene sequences.

42 <sup>b</sup>b.p.: base pair

43 Table S2. Comparison of conserved sequence motifs of BglQM with family 3 Glycoside hydrolases\*.

| Glycoside hydrolases of Family 3 <sup>a</sup> | 157-169 <sup>b</sup> | 231-244 <sup>c</sup> | 449-462 <sup>d</sup> |
|-----------------------------------------------|----------------------|----------------------|----------------------|
| BglQM (This study)                            | VGACIKHFVANNQ        | EWGFEGFVMSDWYA       | IVISRISGEGYDRK       |
| U. mic                                        | VGACIKHFVANNQ        | EWGFEGFVMSDWYA       | IVISRISGEGYDRK       |
| B. GL1                                        | VGACIKHFVNEQ         | EWGFEGFVMTDWFA       | YILTRISGEGVDRK       |
| P. C7                                         | VGATLKHFAANDQ        | EWGFDGVVMTDWGA       | VVLYRVSGEGWDRR       |
| P. TS12                                       | VGTSCLKHFAVNNQ       | EWGHEGIVVSDWGA       | GLPDRYSEEGYDRT       |
| T. nea                                        | VGACIKHFVANNQ        | EWGFEGFVMSDWYA       | IVISRISGEGYDRK       |
| A. acu                                        | VVATAKHYYILNEQ       | ELGFQGFVMSDWGA       | VFVNSDAGEGYISV       |
| F.men                                         | VGACIKHFVANNQ        | EWGFDGFVMSDWYA       | VVISRISGEGYDRK       |
| K. mar                                        | IAATVKHFVCNDL        | EWKWDGMLMSDWFG       | GLNGEWETEYDRE        |
| H. Vul                                        | VAACA KH FVGDGG      | TLKFKGFV I S DWEG    | AIVAVGEHPYTE TK      |

▲

44 \* Multiple sequence alignment of BglQM and selected glycoside hydrolase family 3 enzymes by using Clustal Omega

45 (1.1.0).

46 a. Full species names and Genbank IDs of the glycoside hydrolases in family 3 are as follows, *Mucilagibacter* sp.

47 QM49 β-glucosidase [BglQM (This study)], JX403802; Unidentified microorganism β-glucosidase (U. mic), ABU68675;

48 *Bacillus* sp. GL1 β-glucosidase (B. GL1), BAA36161; *Paenibacillus* sp. C7 β-glucosidase (P. C7), AAX35883;

49 *Paenibacillus* sp. TS12 glucosylceramidase (P. TS12), BAC16750; *Thermotoga neapolitana* β-glucosidase (T. nea),

50 ABI29899; *Aspergillus aculeatus* β-glucosidase (A. acu), BAA10968; *Flavobacterium meningosepticum* β-glucosidase

51 (*F.men*), AAB66561; *Kluyveromyces marxianus* β-glucosidase (K. mar), ACY95404; *Hordeum vulgare* subsp. Vulgare β-

52 D-glucan exohydrolase isoenzyme (H. Vul), AF102868. BglQM, U. mic, B. GL1 and P. C7 are in subfamily 6. The

53 conserved residues of P. TS12, T. nea, A. acu, F.men have been analysed (1, 3, 5).

54 b. Conserved sequence containing a putative carbohydrate-binding site (3). The conserved residues are shown in box.

55 c. Conserved sequence containing the catalytic nucleophile (▲)(1). The conserved residues are shown in box.

56 d. Conserved sequence containing the catalytic acid (1, 3, 5). The conserved glutamic residues are shown in box,  
57 including those that have been experimentally determined previously, which are highlighted in gray.

58

59 **References:**

- 60 1. **Joseph V, Maria H and Geoffrey F.** 1999. Three-dimensional structure of a barley b-D-glucan  
61 exohydrolase, a family 3 glycosyl hydrolase. *Structure*. **7**:179-190.
- 62 2. **Kimura, M.** 1983. *The Neutral Theory of Molecular Evolution*. Cambridge University Press,  
63 Cambridge, United Kingdom.
- 64 3. **Preeyanuch T, Lauren SM, Ana CA, Prachumporn TK and Harry B.** 2013. Identification of the  
65 acid/base catalyst of a glycoside hydrolase family 3 (GH3)  $\beta$ -glucosidase from *Aspergillus niger*  
66 ASKU28. *BBA-GEN. SUBJECTS*. **1830**: 2739–2749.
- 67 4. **Saitou, N., and M. Nei.** 1987. The neighbor-joining method: a new method for reconstructing  
68 phylogenetic trees. *Mol. Biol. Evol.* **4**:406-425.
- 69 5. **Suzuki K, Sumitani J, Nam YW, Nishimaki T, Tani S and Wakagi T.** 2013. Crystal structures of  
70 glycoside hydrolase family 3  $\beta$ -glucosidase 1 from *Aspergillus aculeatus*. *Biochem. J.* **452**: 211-221.

71

72
